# Supplementary material for: Trends in psychiatric disorders prevalence and prescription patterns of children in Alberta, Canada
Source: Springer Nature journal article supplement (doi:10.1007/s00127-019-01714-w), 2019-05-25
Supplement: MOESM1 [file 16750568]

**Supplement Table A. Description and purpose of data sources used**

| **Data source** | **Description** | **Purpose** |
| --- | --- | --- |
| Discharge Abstract Database | Hospital admissions to acute care facilities including admission and discharge dates, date of birth, sex, and a primary diagnosis code with up to 24 secondary diagnosis codes (ICD-10). | -Identify patients who had a hospitalization for one of the psychiatric disorders of interest (combined with physician visits to define cohort).  -Derive health care utilization (hospitalizations). |
| Practitioner Claims Database | Physician billing claims including date of service, specialty of physician, date of birth, sex, and up to 3 diagnosis codes (ICD-9). | -Identify patients who had a physician visit for one of the psychiatric disorders of interest (combined with hospitalizations to define cohort of interest).  -Derive physician visits with psychiatrists, paediatricians, and GPs. |
| Ambulatory Care Data  (National Ambulatory Care Reporting System and Alberta Ambulatory Care Reporting System) | Ambulatory visits (including visits to emergency departments) including date of visit, date of birth, sex, and a primary diagnosis code with up to 9 secondary diagnosis codes (ICD-10). | -Derive health care utilization (ED visits). |
| Provincial Registry | Tracks healthcare registration in the province including date of birth, sex, postal code, migration in/out of province and date of death. | -Define patient demographics (age, sex, rural residence).  -Determine patient deaths (in order to remove patient from numerator for subsequent years). |
| Pharmaceutical Information Network | Captures dispensations of prescription medications from community pharmacies including date of dispensation, drug identification number, and Anatomical Therapeutic Chemical | -Define medications dispensed for each patient |
| Population Estimates | Annual population estimates, including by age, sex, and postal code. | -Used as the denominator for defining provincial prevalence and incidence rates. |
