# Supplementary material for: Trends in psychiatric disorders prevalence and prescription patterns of children in Alberta, Canada
Source: Springer Nature journal article supplement (doi:10.1007/s00127-019-01714-w), 2019-05-25
Supplement: MOESM2 [file 16750568]

**Supplement Table B: ICD-9 and ICD-10 codes used to define psychiatric disorders**

|  | ICD10 | ICD9 |
| --- | --- | --- |
| [Autism Spectrum Disorders](http://psychcentral.com/disorders/autism-spectrum-disorder-symptoms/) (Formerly [Asperger’s](http://psychcentral.com/lib/aspergers-syndrome/), Autistic Disorder, & [Rett’s](http://psychcentral.com/disorders/retts-disorder-symptoms/)) | F84 Pervasive developmental disorders | 299 : Autistic disorder |
| [Attachment Disorder](http://psychcentral.com/disorders/reactive-attachment-disorder-symptoms/) | F94 Reactive attachment disorder of childhood | 309 Separation anxiety disorder |
| [Attention Deficit/Hyperactivity Disorder](http://psychcentral.com/disorders/childhood-adhd/)/ Conduct disorder | F90 Hyperkinetic disorders | 314 hyperkinetic syndrome of childhood |
| [Conduct Disorder](http://psychcentral.com/disorders/conduct-disorder-symptoms/) | F91.9 Conduct disorders  F92 Mixed disorders of conduct and emotions | 312 disturbance of conduct not elsewhere classified |
| Anxiety | F40 Phobic anxiety disorders  F41 Other anxiety disorders  F93 Emotional disorders with onset specific to childhood | 300.0 anxiety states |
| Depression | F32 Depressive episode  F33 Recurrent depressive disorder  F34 Persistent mood [affective] disorders  F38 Other mood [affective] disorders | 311 depressive disorder, not elsewhere classified |
| Bipolar disorder | F30 Manic episode  F31 Bipolar affective disorder | 296 Affective psychosis |
| Obsessive-Compulsive Disorder | F42 Obsessive - compulsive disorder | 300.3 obsessive-compulsive disorders |
| [Oppositional Defiant Disorder](http://psychcentral.com/disorders/oppositional-defiant-disorder-symptoms/) | F91.3 Oppositional defiant disorder | 313 Disturbance of emotions, other or mixed |
| Stress & adjustment disorder | F43 Reaction to severe stress, and adjustment disorders | 308 acute reaction to stress |
| Schizophrenia | F20 Schizophrenia  F21 Schizotypal disorder  F22 Persistent delusional disorders  F23 Acute and transient psychotic disorders  F24 Induced delusional disorder  F25 Schizoaffective disorders  F28 Other nonorganic psychotic disorders  F29 Unspecified nonorganic psychosis | 295 schizophrenic psychoses |
| Eating disorder | F50 – Eating disorders | 307.1 anorexia nervosa  307.5 other and unspecified disorders of eating |
